# Supplementary material for: Anti-CCR4 treatment depletes regulatory T cells and leads to clinical activity in a canine model of advanced prostate cancer
Source: PubMed Central journal article supplement (PMC8804701; doi:10.1136/jitc-2021-003731), 2022-01-31
Supplement: jitc-2021-003731supp001.pdf [file jitc-2021-003731supp001.pdf]

**Table S1. Clinical features of dogs with prostate cancer and analyzed factors performed in this study.**

| Case ID | Clinical features |      |                               |                 |                                |                            | Analyzed factors <sup>†</sup> |                   |         |      |               |               |
|---------|-------------------|------|-------------------------------|-----------------|--------------------------------|----------------------------|-------------------------------|-------------------|---------|------|---------------|---------------|
|         | Age (years)       | Sex* | Breed                         | Histology       | BRAP <sup>V595E</sup> mutation | Treatment                  | IHC                           | Survival analysis | RNA-Seq | qPCR | Urine (ELISA) | Serum (ELISA) |
| PC1     | 11.2              | MC   | Wire Fox Terrier              | Prostate cancer | Mutation                       | Radical cystoprostatectomy | +                             | +                 | +       | +    | +             | +             |
| PC2     | 11.1              | MC   | Yorkshire Terrier             | Prostate cancer | Mutation                       | Radical cystoprostatectomy | +                             | +                 | +       | +    | +             | +             |
| PC3     | 12.7              | MC   | English Cocker Spaniel        | Prostate cancer | Mutation                       | Radical cystoprostatectomy | +                             | +                 | +       | +    |               |               |
| PC4     | 10.3              | MC   | Border Collie                 | Prostate cancer | Mutation                       | Radical cystoprostatectomy | +                             | +                 | +       | +    | +             | +             |
| PC5     | 11.8              | MI   | Border Collie                 | Prostate cancer | Wild-type                      | Radical cystoprostatectomy | +                             | +                 | +       | +    |               |               |
| PC6     | 11.9              | MC   | Papillon                      | Prostate cancer | Mutation                       | Radical cystoprostatectomy | +                             | +                 | +       | +    | +             | +             |
| PC7     | 12.3              | MI   | Miniature Dachshund           | Prostate cancer | Mutation                       | Radical cystoprostatectomy | +                             | +                 | +       | +    | +             | +             |
| PC8     | 11.4              | MC   | Labrador Retriever            | Prostate cancer | Wild-type                      | Radical cystoprostatectomy | +                             | +                 | +       | +    | +             | +             |
| PC9     | 11.8              | MC   | Maltese                       | Prostate cancer | Wild-type                      | Radical cystoprostatectomy | +                             | +                 | +       | +    | +             | +             |
| PC10    | 10.8              | MC   | Miniature Dachshund           | Prostate cancer | Mutation                       | Radical cystoprostatectomy | +                             | +                 | +       | +    |               |               |
| PC11    | 15.9              | MI   | Miniature Dachshund           | Prostate cancer | Wild-type                      | Radical cystoprostatectomy | +                             | +                 |         |      |               |               |
| PC12    | 9.3               | MC   | Miniature Dachshund           | Prostate cancer | Mutation                       | Radical cystoprostatectomy | +                             | +                 |         |      |               |               |
| PC13    | 11.9              | MC   | Miniature Schnauzer           | Prostate cancer | Mutation                       | Radical cystoprostatectomy | +                             | +                 |         |      |               |               |
| PC14    | 10.4              | MC   | Pembroke Welsh Corgi          | Prostate cancer | Mutation                       | Radical cystoprostatectomy | +                             | +                 |         |      |               |               |
| PC15    | 12.5              | MI   | Miniature Schnauzer           | Prostate cancer | Mutation                       | Radical cystoprostatectomy | +                             | +                 |         |      |               |               |
| PC16    | 11.7              | MC   | Miniature Dachshund           | Prostate cancer | Mutation                       | Radical cystoprostatectomy | +                             | +                 | +       | +    | +             | +             |
| PC17    | 9.0               | MC   | Pug                           | Prostate cancer | Mutation                       | Radical cystoprostatectomy | +                             | +                 | +       | +    | +             | +             |
| PC18    | 11.0              | MC   | Miniature Dachshund           | Prostate cancer | Mutation                       | Radical cystoprostatectomy | +                             | +                 | +       | +    | +             | +             |
| PC19    | 9.9               | MC   | Miniature Dachshund           | Prostate cancer | Mutation                       | Piroxicam                  |                               |                   | +       | +    | +             | +             |
| PC20    | 11.9              | MC   | Miniature Dachshund           | Prostate cancer | Mutation                       | Firocoxib                  |                               |                   |         | +    |               |               |
| PC21    | 12.4              | MC   | Miniature Dachshund           | Prostate cancer | Mutation                       | Piroxicam                  |                               |                   |         | +    | +             | +             |
| PC22    | 11.4              | MC   | Cavalier King Charles Spaniel | Prostate cancer | Mutation                       | Piroxicam                  |                               |                   |         | +    | +             | +             |
| PC23    | 8.2               | MC   | Jack Russell Terrier          | Prostate cancer | Mutation                       | Piroxicam                  |                               |                   |         | +    | +             | +             |
| PC24    | 12.6              | MC   | Brussels Griffon              | Prostate cancer | Mutation                       | Piroxicam                  |                               |                   |         |      | +             | +             |
| PC25    | 12.0              | MC   | Papillon                      | Prostate cancer | Mutation                       | Piroxicam                  |                               |                   |         |      | +             | +             |
| PC26    | 13.3              | MC   | Chihuahua                     | Prostate cancer | Wild-type                      | Piroxicam                  |                               |                   |         |      | +             | +             |
| PC27    | 8.9               | MI   | Pembroke Welsh Corgi          | Prostate cancer | Wild-type                      | Piroxicam                  |                               |                   |         |      | +             | +             |
| PC28    | 10.2              | MC   | Miniature Dachshund           | Prostate cancer | Mutation                       | Piroxicam                  |                               |                   |         |      | +             | +             |
| N1      | 8.1               | MI   | Beagle                        | Normal          | Wild-type                      | -                          | +                             |                   | +       | +    | +             | +             |
| N2      | 10.2              | MI   | Beagle                        | Normal          | Wild-type                      | -                          | +                             |                   | +       | +    | +             | +             |
| N3      | 9.0               | MI   | Beagle                        | Normal          | Wild-type                      | -                          | +                             |                   | +       | +    | +             | +             |
| N4      | 9.1               | MI   | Beagle                        | Normal          | Wild-type                      | -                          | +                             |                   | +       | +    | +             | +             |
| N5      | 4.5               | MI   | Beagle                        | Normal          | Wild-type                      | -                          | +                             |                   |         | +    | +             | +             |
| N6      | 4.5               | MI   | Beagle                        | Normal          | Wild-type                      | -                          | +                             |                   |         |      | +             | +             |
| N7      | 4.6               | MI   | Beagle                        | Normal          | Wild-type                      | -                          | +                             |                   |         |      | +             | +             |
| N8      | 4.6               | MI   | Beagle                        | Normal          | Wild-type                      | -                          | +                             |                   |         |      | +             | +             |
| N9      | 4.8               | MI   | Beagle                        | Normal          | Wild-type                      | -                          | +                             |                   |         |      | +             | +             |
| N10     | 8.8               | MI   | Beagle                        | Normal          | Wild-type                      | -                          |                               |                   |         |      | +             | +             |
| N11     | 10.4              | MC   | Toy Poodle                    | Normal          | Wild-type                      | -                          |                               |                   |         |      | +             |               |
| N12     | 8.9               | MC   | Maltese                       | Normal          | Wild-type                      | -                          |                               |                   |         |      | +             |               |
| N13     | 10.1              | MC   | Miniature Dachshund           | Normal          | Wild-type                      | -                          |                               |                   |         |      | +             |               |
| N14     | 7.6               | MC   | Papillon                      | Normal          | Wild-type                      | -                          |                               |                   |         |      | +             |               |

\*MC, male castrated; MI, male intact. <sup>†</sup>IHC, immunohistochemistry; RNA-Seq, RNA sequencing; qPCR, quantitative PCR; ELISA, enzyme-linked immunosorbent assay.
