# Supplementary material for: Anti-CCR4 treatment depletes regulatory T cells and leads to clinical activity in a canine model of advanced prostate cancer
Source: PubMed Central journal article supplement (PMC8804701; doi:10.1136/jitc-2021-003731), 2022-01-31
Supplement: jitc-2021-003731supp002.pdf [file jitc-2021-003731supp002.pdf]

**Table S2. Characteristics of human patients with prostate cancer.**

| Case ID | Age (years) | Sex* | Pathological diagnosis     | Gleason score | TNM classification | Minimum stage grouping | Foxp3 <sup>+</sup> cells (cells/HPF) <sup>†</sup> | CCR4 <sup>+</sup> cells (cells/HPF) <sup>†</sup> |
|---------|-------------|------|----------------------------|---------------|--------------------|------------------------|---------------------------------------------------|--------------------------------------------------|
| hPC1    | 74          | M    | Adenocarcinoma of prostate | 3+4=7/10      | pT2apN0pMX         | II                     | 2.2                                               | 5.2                                              |
| hPC2    | 60          | M    | Adenocarcinoma of prostate | 3+4=7/10      | pT2cpNXpMX         | II                     | 8                                                 | 16.4                                             |
| hPC3    | 52          | M    | Adenocarcinoma of prostate | 3+4=7/10      | pT2bpN0pMX         | II                     | 5                                                 | 0.8                                              |
| hPC4    | 59          | M    | Adenocarcinoma of prostate | 3+4=7/10      | pT2cpNXpMX         | II                     | 17                                                | 29.6                                             |
| hPC5    | 61          | M    | Adenocarcinoma of prostate | 3+4=7/10      | pT3bpN0pMX         | III                    | 5.2                                               | 4.2                                              |
| hPC6    | 75          | M    | Adenocarcinoma of prostate | 3+4=7/10      | pT2cpN0pMX         | II                     | 14.6                                              | 51.6                                             |
| hPC7    | 54          | M    | Adenocarcinoma of prostate | 3+4=7/10      | pT2apN0pMX         | II                     | 4.4                                               | 18.4                                             |
| hPC8    | 57          | M    | Adenocarcinoma of prostate | 3+4=7/10      | pT2bpN0pMX         | II                     | 19.8                                              | 46.6                                             |
| hPC9    | 62          | M    | Adenocarcinoma of prostate | 3+4=7/10      | pT3bpNXpMX         | III                    | 4.8                                               | 2.2                                              |
| hPC10   | 61          | M    | Adenocarcinoma of prostate | 3+4=7/10      | pT3bpNXpMX         | III                    | 12.4                                              | 9.8                                              |
| hPC11   | 58          | M    | Adenocarcinoma of prostate | 3+4=7/10      | pT2cpN0pMX         | II                     | 12.6                                              | 10.2                                             |
| hN1     | 62          | M    | Normal                     | —             | —                  | —                      | 3                                                 | 0.8                                              |
| hN2     | 54          | M    | Normal                     | —             | —                  | —                      | 1.2                                               | 0.2                                              |
| hN3     | 65          | M    | Normal                     | —             | —                  | —                      | 1                                                 | 4.8                                              |
| hN4     | 66          | M    | Normal                     | —             | —                  | —                      | 1.4                                               | 1.4                                              |
| hN5     | 70          | M    | Normal                     | —             | —                  | —                      | 2.2                                               | 2                                                |
| hN6     | 65          | M    | Normal                     | —             | —                  | —                      | 2                                                 | 2.6                                              |

\*M, male. <sup>†</sup>HPF, high power field.
