# Supplementary material for: Anti-CCR4 treatment depletes regulatory T cells and leads to clinical activity in a canine model of advanced prostate cancer
Source: PubMed Central journal article supplement (PMC8804701; doi:10.1136/jitc-2021-003731), 2022-01-31
Supplement: jitc-2021-003731supp004.pdf [file jitc-2021-003731supp004.pdf]

**Table S3. Primer pair sequences used for RT-qPCR.**

| Primer set | GenBank accession number |         | Primer sequence (5'–3')           |
|------------|--------------------------|---------|-----------------------------------|
| IL-10      | NM_001003077             | Forward | CGA CCC AGA CAT CAA GAA CC        |
|            |                          | Reverse | CAC AGG GAA GAA ATC GGT GA        |
| TGF-β      | NM_001003309             | Forward | CTG GAG TCG TGA GGC AGT G         |
|            |                          | Reverse | GCA GTG TGT TAT CTT TGC TGT CA    |
| CCL3       | NM_001005251             | Forward | CAA GCA GAT TCC ACG CAA GGT       |
|            |                          | Reverse | TAA TAC CGG GCT TGG AGC AT        |
| CCL4       | NM_001005250             | Forward | CGT CCT TTC TCT CCT TGT GC        |
|            |                          | Reverse | GAA TCT TCC GCA GGG TGT AA        |
| CCL5       | NM_001003010             | Forward | GGT CTC CGC AGC TAC CTT T         |
|            |                          | Reverse | AAA GCA GCA GGG TGT GGT           |
| CCL7       | NM_001010960             | Forward | CCC ATC CAG AAG CTG AAG AG        |
|            |                          | Reverse | CGT CCT TAG CCA GTT TGG TC        |
| CCL8       | NM_001005255             | Forward | GTC CTT GCT CAG CCA GAT TC        |
|            |                          | Reverse | ACT GGC TGT TGG TGA TCC TC        |
| CCL13      | NM_001003966             | Forward | GCC CTA TTC ACT TGC TGC TT        |
|            |                          | Reverse | AAT CCT GGA CCC ATT TCT CC        |
| CCL14      | XM_537723                | Forward | TCA CGA GGA CCT TAC CAT CC        |
|            |                          | Reverse | GGC CAT TTT TGG TGA TGA AG        |
| CCL17      | NM_001003051             | Forward | GGC TGA CAA GGT GGT ACA AGA CTT C |
|            |                          | Reverse | CAG ATG GAC TTG CCT TGG ACA G     |
| CCL22      | XM_003433778             | Forward | TAT GGT GCC AAC GTG GAA GA        |
|            |                          | Reverse | GAT CTC CCG ATC CTT GAC AGT TAG   |
| CCL24      | NM_001003967             | Forward | CCT GCT GCA TGT TCT TCA TTT C     |
|            |                          | Reverse | TTC TGG TTC TTC TTG GTG GTG A     |
| CCL28      | NM_001005257             | Forward | CAG ACA GGA CTC ACT CTC GCT CTC   |
|            |                          | Reverse | TGT GAA ACC TCA GTG CAA CAG CTA   |
| CXCL8      | NM_001003200             | Forward | CTT CCA AGC TGG CTG TTG CTC       |
|            |                          | Reverse | TGG GCC ACT GTC AAT CAC TCT C     |
| CXCL10     | NM_001010949             | Forward | ATT GAG ATG ATT CCT GCA AGT       |
|            |                          | Reverse | TCA GAC ATC TTT TCT CCC CAC TC    |
| CXCL13     | XM_845089                | Forward | GGG TGC CCA AAA AGA GAA ATC       |
|            |                          | Reverse | GAT GGG AGG GTT CAA GCA TAC A     |
| CXCL16     | XM_014113226             | Forward | GAG AGC CAG AAG CAG CAG AT        |
|            |                          | Reverse | GTG ACT GCT CCC TCC TCT TG        |
| CX3CL1     | AB648939                 | Forward | CTT CCT TGG CCT CCT CTT CT        |
|            |                          | Reverse | GGC ACC AGG ACA TAC GAG TT        |
| RPL13A     | AJ388525                 | Forward | GCC GGA AGG TTG TAG TCG T         |
|            |                          | Reverse | GGA GGA AGG CCA GGT AAT TC        |
| RPL32      | XM_848016                | Forward | TGG TTA CAG GAG CAA CAA GAA A     |
|            |                          | Reverse | GCA CAT CAG CAG CAC TTC A         |

IL, interleukin; RPL, ribosomal protein L.
