# Supplementary material for: Anti-CCR4 treatment depletes regulatory T cells and leads to clinical activity in a canine model of advanced prostate cancer
Source: PubMed Central journal article supplement (PMC8804701; doi:10.1136/jitc-2021-003731), 2022-01-31
Supplement: jitc-2021-003731supp005.pdf [file jitc-2021-003731supp005.pdf]

**Table S4. Characteristics of dogs with prostate cancer in the clinical trial.**

| Case ID | Age (years) | Sex* | Breed                | TNM classification (at first visit) | BRAF <sup>V595E</sup> mutation | Treatment                  | Response <sup>†</sup> | Progression-free survival (days) | Overall survival (days) |
|---------|-------------|------|----------------------|-------------------------------------|--------------------------------|----------------------------|-----------------------|----------------------------------|-------------------------|
| M1      | 9.8         | MC   | Papillon             | T2N1M0                              | Mutation                       | Mogamulizumab<br>Piroxicam | PR                    | 105                              | 296                     |
| M2      | 11.5        | MC   | Miniature Dachshund  | T4N0M0                              | Mutation                       | Mogamulizumab<br>Piroxicam | SD                    | 66                               | 381                     |
| M3      | 7.2         | MC   | Miniature Dachshund  | T3N0M0                              | Mutation                       | Mogamulizumab<br>Piroxicam | SD                    | 505                              | 1000                    |
| M4      | 12.1        | MC   | Miniature Dachshund  | T4N0M0                              | Mutation                       | Mogamulizumab<br>Piroxicam | PR                    | 116                              | 162                     |
| M5      | 13          | MC   | Miniature Dachshund  | T3N0M0                              | Wild-type                      | Mogamulizumab<br>Piroxicam | SD                    | 287                              | 368                     |
| M6      | 9.6         | MI   | Miniature Dachshund  | T3N1M0                              | Mutation                       | Mogamulizumab<br>Piroxicam | PR                    | 209                              | 232                     |
| M7      | 12.9        | MC   | Chihuahua            | T4N1M0                              | Wild-type                      | Mogamulizumab<br>Piroxicam | SD                    | 57                               | 147                     |
| M8      | 14.8        | MC   | Miniature Schnauzer  | T4N0M0                              | Wild-type                      | Mogamulizumab<br>Piroxicam | SD                    | 208                              | 458                     |
| M9      | 12          | MC   | Papillon             | T4N1M1                              | Wild-type                      | Mogamulizumab<br>Piroxicam | SD                    | 42                               | 86                      |
| M10     | 11.6        | MC   | Chihuahua            | T3N1M1                              | Mutation                       | Mogamulizumab<br>Piroxicam | PR                    | 133                              | 227                     |
| M11     | 13.7        | MC   | Toy Poodle           | T4N1M0                              | Wild-type                      | Mogamulizumab<br>Piroxicam | PR                    | 63                               | 404                     |
| M12     | 12.6        | MC   | Miniature Schnauzer  | T2N0M0                              | Mutation                       | Mogamulizumab<br>Piroxicam | SD                    | 106                              | 116                     |
| M13     | 12.2        | MC   | Miniature Dachshund  | T3N0M0                              | Mutation                       | Mogamulizumab<br>Piroxicam | SD                    | 540                              | 644                     |
| M14     | 14.8        | MC   | Miniature Dachshund  | T2N0M0                              | Mutation                       | Mogamulizumab<br>Piroxicam | SD                    | 204                              | 884                     |
| M15     | 13.4        | MC   | Miniature Dachshund  | T4N1M1                              | Mutation                       | Mogamulizumab<br>Piroxicam | SD                    | 238                              | 345                     |
| M16     | 12.4        | MI   | Miniature Dachshund  | T4N1M1                              | Wild-type                      | Mogamulizumab<br>Piroxicam | PD                    | 26                               | 187                     |
| M17     | 9.8         | MC   | Miniature Dachshund  | T4N1M0                              | Mutation                       | Mogamulizumab<br>Piroxicam | SD                    | 225                              | 325                     |
| M18     | 13.5        | MC   | Toy Poodle           | T4N0M0                              | Mutation                       | Mogamulizumab<br>Piroxicam | SD                    | 573                              | >759                    |
| M19     | 13.6        | MC   | Miniature Schnauzer  | T4N1M1                              | Mutation                       | Mogamulizumab<br>Piroxicam | PR                    | 84                               | 133                     |
| M20     | 13.5        | MI   | Pug                  | T4N1M0                              | Wild-type                      | Mogamulizumab<br>Piroxicam | PD                    | 21                               | 136                     |
| M21     | 13.8        | MC   | Chihuahua            | T2N0M0                              | Mutation                       | Mogamulizumab<br>Piroxicam | SD                    | 253                              | 260                     |
| M22     | 13.3        | MC   | Pomeranian           | T1N0M0                              | Mutation                       | Mogamulizumab<br>Piroxicam | PR                    | 377                              | 970                     |
| M23     | 13.2        | MC   | Toy Poodle           | T2N0M0                              | Mutation                       | Mogamulizumab<br>Piroxicam | SD                    | 281                              | >312                    |
| P1      | 8.5         | MC   | Pembroke Welsh Corgi | T3N1M0                              | Mutation                       | Piroxicam                  | PD                    | 22                               | 22                      |
| P2      | 11.1        | MI   | French Bulldog       | T4N0M0                              | Mutation                       | Piroxicam                  | SD                    | 71                               | 166                     |
| P3      | 9.8         | MC   | Miniature Dachshund  | T4N1M1                              | Mutation                       | Piroxicam                  | PD                    | 14                               | 14                      |
| P4      | 11.6        | MC   | Miniature Dachshund  | T3N1M0                              | Wild-type                      | Piroxicam                  | SD                    | 46                               | 68                      |

|     |      |    |                               |        |           |           |    |     |     |
|-----|------|----|-------------------------------|--------|-----------|-----------|----|-----|-----|
| P5  | 11.8 | MC | Miniature Dachshund           | T3N0M1 | Mutation  | Piroxicam | SD | 65  | 65  |
| P6  | 12.1 | MC | Miniature Dachshund           | T2N1M0 | Mutation  | Piroxicam | PD | 30  | 206 |
| P7  | 11.4 | MC | Cavalier King Charles Spaniel | T4N1M1 | Wild-type | Piroxicam | PD | 6   | 6   |
| P8  | 11.4 | MC | Wire Fox Terrier              | T4N0M0 | Mutation  | Piroxicam | SD | 118 | 285 |
| P9  | 11.5 | MC | Yorkshire Terrier             | T4N0M0 | Wild-type | Piroxicam | SD | 61  | 149 |
| P10 | 12.4 | MC | English Cocker Spaniel        | T4N0M0 | Mutation  | Piroxicam | SD | 94  | 148 |
| P11 | 12.1 | MI | Border Collie                 | T4N0M0 | Wild-type | Piroxicam | SD | 39  | 151 |
| P12 | 11.8 | MC | Papillon                      | T4N0M0 | Mutation  | Piroxicam | SD | 57  | 92  |
| P13 | 13.8 | MC | Beagle                        | T2N0M0 | Wild-type | Piroxicam | PR | 182 | 263 |
| P14 | 12.3 | MC | Miniature Dachshund           | T4N1M0 | Mutation  | Piroxicam | PD | 29  | 29  |
| P15 | 12.5 | MC | Brussels Griffon              | T4N1M0 | Mutation  | Piroxicam | PD | 28  | 75  |
| P16 | 8.1  | MC | Jack Russel Terrier           | T4N1M0 | Mutation  | Piroxicam | PD | 16  | 103 |
| P17 | 8.6  | MC | Miniature Dachshund           | T2N1M0 | Mutation  | Piroxicam | PD | 26  | 56  |
| P18 | 12.2 | MC | Miniature Dachshund           | T1N0M0 | Mutation  | Piroxicam | SD | 182 | 229 |
| P19 | 12.4 | MI | Miniature Schnauzer           | T3N1M1 | Mutation  | Piroxicam | SD | 42  | 77  |
| P20 | 15.7 | MC | Miniature Dachshund           | T2N0M0 | Mutation  | Piroxicam | SD | 210 | 389 |
| P21 | 8.9  | MI | Pembroke Welsh Corgi          | T4N1M1 | Wild-type | Piroxicam | SD | 85  | 99  |
| P22 | 13   | MC | Toy Poodle                    | T4N0M0 | Mutation  | Piroxicam | PR | 139 | 468 |
| P23 | 12.2 | MC | Miniature Dachshund           | T2N0M0 | Mutation  | Piroxicam | SD | 80  | 86  |

\*MC, male castrated; MI, male intact. †SD, stable disease; PR, partial response; PD, progressive disease.
